# Supplementary material
Source: PubMed Central journal article supplement (PMC6739225)
Supplement: EMS83726-supplement-1.pdf [file EMS83726-supplement-1.pdf]

# **Genetic predisposition, modifiable risk factor profile and long-term dementia risk in the general population**

Silvan Licher<sup>1</sup>, Shahzad Ahmad<sup>1</sup>, Hata Karamujić-Čomić<sup>1</sup>, Trudy Voortman<sup>1</sup>, Maarten J.G. Leening<sup>1,2,3</sup>, M. Arfan Ikram<sup>1</sup>, M. Kamran Ikram<sup>1,4</sup>

<sup>1</sup> Department of Epidemiology, Erasmus MC– University Medical Center Rotterdam, Rotterdam, the Netherlands

<sup>2</sup> Department of Cardiology, Erasmus MC – University Medical Center Rotterdam, Rotterdam, the Netherlands

<sup>3</sup> Department of Epidemiology, Harvard T.H. Chan School of Public Health, Boston, MA, United States

<sup>4</sup> Department of Neurology, Erasmus MC– University Medical Center Rotterdam, Rotterdam, the Netherlands

**Appendix A.** Supplementary figure.....3

**Appendix B.** Supplementary tables.....4

**Appendix A.** Supplementary figure

**Figure 1.** Flow-chart of study population

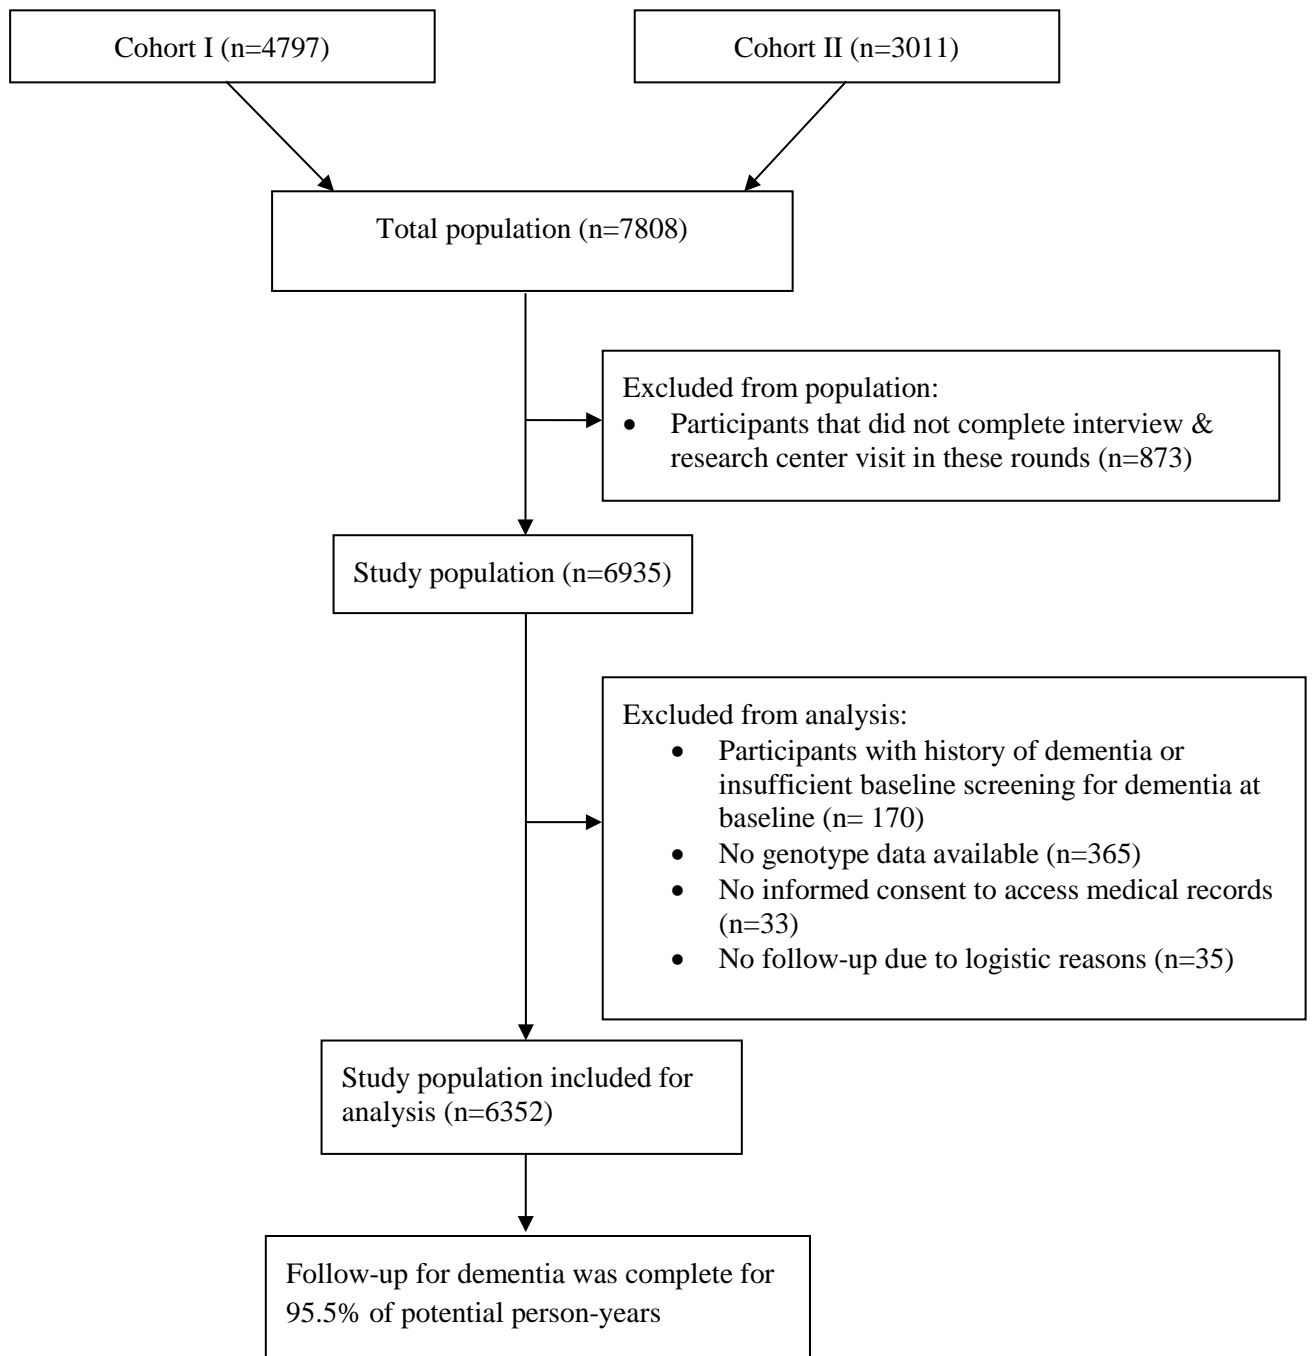

Appendix B. Supplementary tables

Table 1. Genetic variants included in the polygenic risk score

| Chr | BP        | SNP         | Gene    | Risk allele | Locus discovered in                   | Effect size | Minor Allele | Maf_RS1 | R <sup>2</sup> -RS1 | R <sup>2</sup> -RS2 |
|-----|-----------|-------------|---------|-------------|---------------------------------------|-------------|--------------|---------|---------------------|---------------------|
| 1   | 207802552 | rs4844610   | CR1     | A           | Lambert et al. (2009)                 | 0.157003749 | A            | 0.19039 | 0.9968              | 0.99498             |
| 2   | 127892810 | rs6733839   | BIN1    | T           | Seshadri et al.                       | 0.182321557 | T            | 0.39584 | 0.95965             | 0.91998             |
| 2   | 233981912 | rs10933431  | INPP5D  | C           | Lambert et al.                        | 0.094310679 | G            | 0.21024 | 0.93279             | 0.92668             |
| 5   | 88223420  | rs190982    | MEF2C   | A           | Lambert et al. (2013)                 | 0.061875404 | G            | 0.395   | 0.97929             | 0.93602             |
| 6   | 41129252  | rs75932628  | TREM2   | T           | Guerreiro et al. , Jonsson et al.     | 0.732367894 | T            | 0.00197 | 0.7976              | 0.77763             |
| 6   | 47431284  | rs9473117   | CD2AP   | C           | Hollingworth et al. , Naj et al.      | 0.086177696 | C            | 0.27668 | 0.99424             | 0.99517             |
| 6   | 41129207  | rs143332484 | TREM2   | T           | Sims et al. , (2017)                  | 0.457424847 | T            | 0.01288 | 0.83663             | 0.8099              |
| 7   | 100091795 | rs12539172  | ZCWPW1  | C           | Lambert et al., Kunkle et al.         | 0.083381609 | T            | 0.34739 | 0.99958             | 0.99947             |
| 7   | 143099133 | rs10808026  | EPHA1   | C           | Hollingworth et al. , Naj et al.      | 0.105360516 | A            | 0.20154 | 0.98093             | 0.98031             |
| 7   | 37844263  | rs4723711   | NME8    | A           | Lambert et al. (2013)                 | 0.061875404 | T            | 0.35445 | 0.99933             | 0.99924             |
| 8   | 27219987  | rs73223431  | PTK2B   | T           | Lambert et al. (2013)                 | 0.09531018  | T            | 0.38498 | 0.99562             | 0.99678             |
| 8   | 27467686  | rs9331896   | CLU     | T           | Harold et al. , Lambert et al. (2009) | 0.127833372 | C            | 0.39809 | 0.90325             | 0.97633             |
| 11  | 47380340  | rs3740688   | CELF1   | T           | Lambert et al. (2013)                 | 0.083381609 | G            | 0.4464  | 0.98617             | 0.98504             |
| 11  | 59936926  | rs7933202   | MS4A2   | A           | Hollingworth et al. , Naj et al.      | 0.116533816 | C            | 0.40726 | 0.99544             | 0.99719             |
| 11  | 85868640  | rs3851179   | PICALM  | C           | Harold et al.                         | 0.127833372 | T            | 0.37041 | 0.9992              | 0.99951             |
| 11  | 121435587 | rs11218343  | SORL1   | T           | Lambert et al. (2013)                 | 0.223143551 | C            | 0.04651 | 0.9979              | 0.99592             |
| 14  | 53391680  | rs17125924  | FERMT2  | G           | Lambert et al. (2013)                 | 0.131028262 | G            | 0.09948 | 0.99862             | 0.99842             |
| 14  | 92932828  | rs12881735  | SLC24A4 | T           | Lambert et al. (2013)                 | 0.083381609 | C            | 0.24057 | 0.99526             | 0.99591             |
| 15  | 59045774  | rs593742    | ADAM10  | A           | Kunkle et al. (2019)                  | 0.072570693 | G            | 0.33247 | 0.99626             | 0.99625             |
| 16  | 19808163  | rs7185636   | IQCK    | T           | Kunkle et al. (2019)                  | 0.083381609 | C            | 0.17569 | 0.98562             | 0.98756             |
| 16  | 79355857  | rs62039712  | WWOX    | A           | Kunkle et al. (2019)                  | 0.148420005 | A            | 0.12707 | 0.77987             | 0.80096             |
| 16  | 81942028  | rs72824905  | PLCG2   | C           | Sims et al. , (2017)                  | 0.431782416 | C            | 0.01013 | 0.94589             | 0.94491             |
| 17  | 61538148  | rs138190086 | ACE     | A           | Kunkle et al. (2019)                  | 0.262364264 | A            | 0.01703 | 0.83116             | 0.86548             |
| 17  | 47297297  | rs616338    | ABI3    | T           | Sims et al. , (2017)                  | 0.350656872 | T            | 0.01137 | 0.64079             | 0.62751             |
| 19  | 1056492   | rs3752246   | ABCA7   | G           | Hollingworth et al. , Naj et al.      | 0.139761942 | G            | 0.16336 | 0.91902             | 0.93084             |
| 20  | 54997568  | rs6024870   | CASS4   | G           | Lambert et al. (2013)                 | 0.127833372 | A            | 0.0815  | 0.9842              | 0.98621             |
| 21  | 28156856  | rs2830500   | ADAMTS1 | C           | Kunkle et al. (2019)                  | 0.072570693 | A            | 0.30571 | 0.97586             | 0.97907             |

Ordered by chromosome number. Effect estimates taken from Kunkle et al.<sup>1</sup> and Sims et al.<sup>2</sup> (TREM2- rs143332484, PLCG2 and ABI3) Additional references: Harold et al.<sup>3</sup>, Seshadri et al.<sup>4</sup>, Hollingworth et al.<sup>5</sup>, Naj et al.<sup>6</sup>, Lambert et al. (2009,2013)<sup>7,8</sup>, Jonsson et al.<sup>9</sup>, and Ruiz et al.<sup>10</sup> Minor allele Frequency (Maf) of Rotterdam Study (RS) 1 is shown and is representative of the MAF in RS2. R<sup>2</sup>= imputation quality. RS1= initial Rotterdam Study cohort and RS2=first extension Rotterdam Study. Rotterdam Study cohorts were imputed separately. Gene names are ncbi gene names assigned to the loci in the corresponding references

**Table 2.** Absolute 15-year anticipated risk of dementia according to modifiable risk factor profiles, across different levels of genetically determined risk based on *APOE* carrier status

|                                               |              | <b>N/n</b> | <b>Low genetic risk<br/>Mean (95% CI)</b> | <b>N/n</b> | <b>Intermediate<br/>genetic risk<br/>Mean (95% CI)</b> | <b>N/n</b> | <b>High genetic risk<br/>Mean (95% CI)</b> |
|-----------------------------------------------|--------------|------------|-------------------------------------------|------------|--------------------------------------------------------|------------|--------------------------------------------|
| <b>Overall</b>                                | Overall      | 887/85     | 15.8% (4.6;32.0)                          | 3718/456   | 16.1% (10.0;19.2)                                      | 1747/374   | 18.6% (12.8;23.8)                          |
| <b>Modifiable<br/>risk factor<br/>profile</b> | Favorable    | 568/44     | 12.6% (4.5;26.8)                          | 2453/253   | 13.5% (8.9;15.6)                                       | 1132/241   | 18.2% (12.7;22.2)                          |
|                                               | Intermediate | 224/23     | 16.7% (8.0;36.5)                          | 884/139    | 20.6% (12.6;22.1)                                      | 443/97     | 19.2% (12.6;21.7)                          |
|                                               | Unfavorable  | 95/18      | 32.1% (0.0;59.9)                          | 381/64     | 22.0% (8.3;39.2)                                       | 172/36     | 19.5% (2.5;27.3)                           |

Based on age, sex, education, and modifiable risk factor profile. Confidence intervals computed based on 1000 bootstrap samples. Since baseline characteristics of participants across strata of genetic risk are not identical, anticipated absolute risks may vary beyond the contribution of genetic and modifiable risk factors. Given that these estimations also take into account the contribution of other risk factors for dementia risk, namely age, sex and educational level, predicted risks are not directly comparable across genetic and modifiable risk strata.

Abbreviations: N=number of people at risk, n=number of cases.

**Table 3.** Risk of incident dementia stratified by modifiable risk factor profiles and genetic risk, separately for participants below and above the median age (68.2 years)

| <b>Genetic risk</b>   |              | <b>Low</b> |                    | <b>Intermediate</b> |                    | <b>High</b> |                    |
|-----------------------|--------------|------------|--------------------|---------------------|--------------------|-------------|--------------------|
|                       |              | <b>N/n</b> | <b>HR (95% CI)</b> | <b>N/n</b>          | <b>HR (95% CI)</b> | <b>N/n</b>  | <b>HR (95% CI)</b> |
| <b>&lt;68.2 years</b> | Favorable    | 311/7      | Ref.               | 1421/110            | Ref.               | 641/79      | Ref.               |
|                       | Intermediate | 84/2       | 1.21 (0.24;6.19)   | 371/19              | 1.71 (1.00;2.93)   | 207/27      | 1.23 (0.80;1.92)   |
|                       | Unfavorable  | 33/3       | 7.50 (1.73;32.4)   | 133/10              | 2.69 (1.33;5.44)   | 64/6        | 0.96 (0.42;2.23)   |
| <b>≥68.2 years</b>    | Favorable    | 257/37     | Ref.               | 1319/46             | Ref.               | 491/162     | Ref.               |
|                       | Intermediate | 140/21     | 1.14 (0.96;1.36)   | 513/120             | 1.26 (1.00;1.60)   | 236/70      | 0.97 (0.73;1.30)   |
|                       | Unfavorable  | 62/15      | 1.31 (1.04;1.63)   | 248/54              | 1.33 (0.97;1.82)   | 118/30      | 1.05 (0.70;1.57)   |

Adjusted for: age, sex and education

Abbreviations: n=number of cases, N=number of people at risk, HR=hazard ratio, CI=confidence interval.

**Table 4.** Risk of incident dementia stratified by modifiable risk factor profiles and genetic risk, separately for participants below and above age of 70 years

| Genetic risk          |              | Low    |                   | Intermediate |                  | High    |                  |
|-----------------------|--------------|--------|-------------------|--------------|------------------|---------|------------------|
|                       |              | N/n    | HR (95% CI)       | N/n          | HR (95% CI)      | N/n     | HR (95% CI)      |
| <b>&lt;70.0 years</b> | Favorable    | 351/10 | Ref.              | 1515/65      | Ref.             | 716/90  | Ref.             |
|                       | Intermediate | 98/3   | 1.29 (0.35;4.81)  | 423/25       | 1.68 (1.06;2.68) | 239/3   | 1.19 (0.79;1.78) |
|                       | Unfavorable  | 39/4   | 3.93 (1.19;12.94) | 157/10       | 1.80 (0.92;3.53) | 73/11   | 1.65 (0.87;3.13) |
| <b>≥70.0 years</b>    | Favorable    | 217/34 | Ref.              | 938/188      | Ref.             | 416/151 | Ref.             |
|                       | Intermediate | 126/20 | 1.14 (0.63;2.05)  | 462/114      | 1.25 (0.98;1.59) | 204/64  | 0.95 (0.70;1.29) |
|                       | Unfavorable  | 56/14  | 2.18 (1.12;4.24)  | 224/54       | 1.38 (1.00;1.89) | 99/25   | 0.85 (0.55;1.31) |

Adjusted for: age, sex and education

Abbreviations: n=number of cases, N=number of people at risk, HR=hazard ratio, CI=confidence interval.

**Table 5.** Risk of incident dementia stratified by modifiable risk factor profiles and genetic risk, separately for men and women

| <b>Genetic risk</b> |              | <b>Low</b> |                    | <b>Intermediate</b> |                    | <b>High</b> |                    |
|---------------------|--------------|------------|--------------------|---------------------|--------------------|-------------|--------------------|
|                     |              | <b>N/n</b> | <b>HR (95% CI)</b> | <b>N/n</b>          | <b>HR (95% CI)</b> | <b>N/n</b>  | <b>HR (95% CI)</b> |
| <b>Men</b>          | Favorable    | 252/15     | Ref.               | 1185/110            | Ref.               | 557/108     | Ref.               |
|                     | Intermediate | 74/3       | 0.88 (0.25;3.09)   | 350/41              | 1.39 (0.96;2.00)   | 175/22      | 0.84 (0.52;1.33)   |
|                     | Unfavorable  | 32/5       | 3.72 (1.24;11.1)   | 109/8               | 1.04 (0.50;2.17)   | 45/5        | 0.67 (0.27;1.68)   |
| <b>Women</b>        | Favorable    | 316/29     | Ref.               | 1268/143            | Ref.               | 575/133     | Ref.               |
|                     | Intermediate | 150/20     | 1.28 (0.70;2.34)   | 534/98              | 1.24 (0.95;1.63)   | 268/75      | 1.09 (0.82;1.47)   |
|                     | Unfavorable  | 62/13      | 2.33 (1.17;4.62)   | 272/56              | 1.48 (1.07;2.04)   | 127/31      | 1.15 (0.77;1.71)   |

Adjusted for: age, sex and education

Abbreviations: n=number of cases, N=number of people at risk, HR=hazard ratio, CI=confidence interval.



**Table 6.** Risk of incident Alzheimer’s disease according to tertiles of the polygenic risk score

| <b>Polygenic risk score tertiles</b> | <b>N/n</b> | <b>Model 1<br/>HR (95% CI)</b> | <b>Model 2<br/>HR (95% CI)</b> |
|--------------------------------------|------------|--------------------------------|--------------------------------|
| Low risk (first tertile)             | 1864/189   | Reference                      | Reference                      |
| Intermediate risk (second tertile)   | 1885/213   | 1.16 (0.96;1.42)               | 1.15 (0.95;1.40)               |
| High risk (third tertile)            | 1811//251  | 1.53 (1.27;1.85)               | 1.54 (1.27;1.86)               |
| <b>P for trend</b>                   |            | $7.82 \times 10^{-6}$          | $7.46 \times 10^{-6}$          |

Model 1 - adjusted for: age, sex and education

Model 2 - additionally adjusted for: parental history of dementia, history of stroke, systolic blood pressure, total and high-density lipoprotein cholesterol

Abbreviations: N=number of individuals at risk, n=number of Alzheimer’s disease cases during follow-up, HR=hazard ratio, CI=confidence interval. The log rank test was used to calculate P values. Two-sided P values were uncorrected for multiple testing.

**Table 7.** Risk of incident Alzheimer’s disease while stratifying participants both on tertiles of a polygenic risk score and different modifiable risk factor profiles

| <b>Polygenic risk score</b> | <b>Risk factor profile</b> | <b>N/n</b> | <b>HR (95% CI)</b> |
|-----------------------------|----------------------------|------------|--------------------|
| Low (Lowest tertile)        | Favorable                  | 1191/99    | Reference          |
|                             | Intermediate               | 478/60     | 1.11 (0.79;1.56)   |
|                             | Unfavorable                | 195/30     | 1.46 (0.95;2.25)   |
|                             | P for trend                |            | 0.0547             |
| Intermediate (Middle)       | Favorable                  | 1230/125   | Reference          |
|                             | Intermediate               | 454/63     | 1.22 (0.89;1.68)   |
|                             | Unfavorable                | 201/25     | 1.08 (0.69;1.67)   |
|                             | P for trend                |            | 0.3974             |
| High (Highest tertile)      | Favorable                  | 1204/159   | Reference          |
|                             | Intermediate               | 429/60     | 0.97 (0.71;1.31)   |
|                             | Unfavorable                | 178/32     | 1.27 (0.85;1.89)   |
|                             | P for trend                |            | 0.9574             |

Adjusted for: age, sex and education

Abbreviations: n=number of cases, N=number of people at risk, HR=hazard ratio, CI=confidence interval. The log rank test was used to calculate P values. Two-sided P values were uncorrected for multiple testing.

**Table 8.** Risk of incident dementia while stratifying participants both on *APOE* and on levels of modifiable risk based on the Ideal Cardiovascular Health metric

| <i>APOE</i> -related risk                                                 | Risk factor profile | N/n      | HR (95% CI)       |
|---------------------------------------------------------------------------|---------------------|----------|-------------------|
| Low ( $\epsilon 2\epsilon 2/\epsilon 2\epsilon 3$ )                       | Favorable           | 18/1     | Reference         |
|                                                                           | Intermediate        | 426/30   | 1.31 (0.18;9.70)  |
|                                                                           | Unfavorable         | 443/54   | 1.93 (2.64;14.11) |
|                                                                           | P for trend         |          | 0.0942            |
| Intermediate ( $\epsilon 3\epsilon 3$ )                                   | Favorable           | 35/4     | Reference         |
|                                                                           | Intermediate        | 1871/199 | 0.80 (0.28;2.13)  |
|                                                                           | Unfavorable         | 1812/253 | 0.85 (0.31;2.33)  |
|                                                                           | P for trend         |          | 0.2944            |
| High ( $\epsilon 2\epsilon 4/\epsilon 3\epsilon 4/\epsilon 4\epsilon 4$ ) | Favorable           | 20/5     | Reference         |
|                                                                           | Intermediate        | 849/189  | 0.72 (0.30;1.77)  |
|                                                                           | Unfavorable         | 778/180  | 0.55 (0.23;1.36)  |
|                                                                           | P for trend         |          | 0.0085            |

Adjusted for: age, sex and education

Abbreviations: n=number of cases, N=number of people at risk, HR=hazard ratio, CI=confidence interval. The log rank test was used to calculate P values. Two-sided P values were uncorrected for multiple testing.

**Table 9.** Risk of incident dementia while stratifying participants both on *APOE* and on their 10-year predicted risk of fatal cardiovascular diseases

| <i>APOE</i> -related risk                                                 | Risk factor profile | N/n      | HR (95% CI)      |
|---------------------------------------------------------------------------|---------------------|----------|------------------|
| Low ( $\epsilon 2\epsilon 2/\epsilon 2\epsilon 3$ )                       | Favorable           | 386/15   | Reference        |
|                                                                           | Intermediate        | 225/20   | 1.22 (0.58;2.55) |
|                                                                           | Unfavorable         | 256/45   | 1.73 (0.73;4.06) |
|                                                                           | P for trend         |          | 0.1866           |
| Intermediate ( $\epsilon 3\epsilon 3$ )                                   | Favorable           | 1539/83  | Reference        |
|                                                                           | Intermediate        | 991/123  | 1.34 (0.98;1.83) |
|                                                                           | Unfavorable         | 1061/237 | 1.66 (1.16;2.38) |
|                                                                           | P for trend         |          | 0.0061           |
| High ( $\epsilon 2\epsilon 4/\epsilon 3\epsilon 4/\epsilon 4\epsilon 4$ ) | Favorable           | 734/108  | Reference        |
|                                                                           | Intermediate        | 480/109  | 1.01 (0.58;1.28) |
|                                                                           | Unfavorable         | 469/139  | 0.86 (0.74;1.37) |
|                                                                           | P for trend         |          | 0.4528           |

Adjusted for: age, sex and education

Abbreviations: n=number of cases, N=number of people at risk, HR=hazard ratio, CI=confidence interval. The log rank test was used to calculate P values. Two-sided P values were uncorrected for multiple testing.

**Table 10.** Health and lifestyle-specific associations with dementia risk

|                                        | <b>N/n</b> | <b>Model 1</b>     | <b>Model 2</b>     |
|----------------------------------------|------------|--------------------|--------------------|
|                                        |            | <b>HR (95% CI)</b> | <b>HR (95% CI)</b> |
| Abstaining from smoking                | 5093/790   | 0.97 (0.80;1.17)   | 0.97 (0.84;1.18)   |
| Absence of depression                  | 5717/792   | 0.65 (0.54;0.79)   | 0.66 (0.54;0.80)   |
| Absence of diabetes                    | 5618/796   | 0.74 (0.61;0.90)   | 0.74 (0.61;0.91)   |
| Regular physical activity              | 3598/434   | 0.90 (0.78;1.05)   | 0.91 (0.78;1.06)   |
| Avoiding social isolation              | 4526/559   | 1.04 (0.89;1.21)   | 1.05 (0.90;1.22)   |
| Adherence to a healthy dietary pattern | 952/181    | 1.09 (0.92;1.29)   | 1.10 (0.93;1.30)   |

Model 1 - adjusted for: age, sex and education.

Model 2 - additionally adjusted for: parental history of dementia, history of stroke, systolic blood pressure, total and high-density lipoprotein cholesterol

Abbreviations: n=number of cases, N=number of people at risk, HR=hazard ratio, CI=confidence interval.

**Table 11.** Associations of individual Ideal Cardiovascular Health components with the risk of dementia

|                                                                                    | <b>N/n</b> | <b>Model 1<br/>HR (95% CI)</b> | <b>Model 2<br/>HR (95% CI)</b> |
|------------------------------------------------------------------------------------|------------|--------------------------------|--------------------------------|
| 1. Abstaining from smoking                                                         | 5093/790   | 0.97 (0.80;1.17)               | 0.97 (0.84;1.18)               |
| 2. Ideal body mass index                                                           | 2071/306   | 1.09 (0.95;1.26)               | 1.08 (0.94;1.24)               |
| 3. Ideal physical activity                                                         | 3598/434   | 0.74 (0.61;0.90)               | 0.74 (0.61;0.91)               |
| 4. Adherence to a healthy dietary pattern                                          | 952/181    | 1.09 (0.92;1.29)               | 1.10 (0.93;1.30)               |
| 5. Untreated total cholesterol <5.2 mmol/L                                         | 1565/209   | 0.97 (0.83;1.14)               | 1.04 (0.88;1.22)               |
| 6. Untreated systolic blood pressure <120 mmHg & diastolic blood pressure <80 mmHg | 737/95     | 1.10 (0.90;1.37)               | 1.09 (0.88;1.35)               |
| 7. Fasting plasma glucose <5.5 mmol/L                                              | 3013/447   | 1.00 (0.88;1.14)               | 1.01 (0.89;1.15)               |

Model 1 - adjusted for: age, sex and education.

Model 2 - additionally adjusted for: parental history of dementia and history of stroke.

Abbreviations: n=number of cases, N=number of people at risk, HR=hazard ratio, CI=confidence interval.

**Table 12.** Associations of the individual SCORE risk equation components with the risk of dementia

|                                         | <b>N/n</b> | <b>Model 1</b>     | <b>Model 2</b>     |
|-----------------------------------------|------------|--------------------|--------------------|
|                                         |            | <b>HR (95% CI)</b> | <b>HR (95% CI)</b> |
| Age, per year                           | 6352/915   | 1.13 (1.12;1.14)   | 1.13 (1.12;1.14)   |
| Current smoking                         | 1259/125   | 1.00 (0.81;1.24)   | 0.99 (0.80;1.23)   |
| Systolic blood pressure, per<br>10 mmHg | 6352/915   | 1.01 (0.98;1.04)   | 1.01 (0.98;1.04)   |
| Total cholesterol, per<br>mmol/L        | 6352/915   | 1.04 (0.97;1.11)   | 1.04 (0.97;1.12)   |

Model 1 - adjusted for: sex.

Model 2 - additionally adjusted for: parental history of dementia and history of stroke.

Abbreviations: n=number of cases, N=number of people at risk, HR=hazard ratio, CI=confidence interval.

**Table 13.** Baseline characteristics for included and excluded participants of the current study

|                                                | <b>Included participants</b><br>N=6352 | <b>Excluded participants</b><br>N=1433 |
|------------------------------------------------|----------------------------------------|----------------------------------------|
| Age, years                                     | 69.1 (8.2)                             | 70.7 (10.6)                            |
| Women                                          | 3572 (56.2)                            | 956 (66.7)                             |
| Educational years, median (IQR)                | 10 (7-13)                              | 10 (7-13)                              |
| Parental history of dementia                   | 427 (6.7)                              | 13 (0.9)                               |
| History of stroke                              | 231 (3.6)                              | 67 (4.7)                               |
| Body mass index, kg/m <sup>2</sup>             | 27.4 (4.0)                             | 26.9 (3.9)                             |
| Systolic blood pressure, mmHg                  | 143 (21)                               | 139 (19)                               |
| Diastolic blood pressure, mmHg                 | 77 (11)                                | 80 (13)                                |
| Total cholesterol, mmol/L                      | 5.8 (1.0)                              | 5.3 (1.0)                              |
| High density lipoprotein cholesterol, mmol/L   | 1.4 (0.4)                              | 1.3 (0.3)                              |
| Fasting glucose, mmol/L                        | 6.0 (1.6)                              | 6.1 (2.1)                              |
| Age of dementia diagnosis                      | 83.1 (6.5)                             | 84.2 (6.5)                             |
| <b>Modifiable health and lifestyle factors</b> |                                        |                                        |
| No current smoking                             | 5064 (79.7)                            | 92 (79.3)*                             |
| Absence of depression                          | 5717 (90.0)                            | 96 (85.0)*                             |
| Absence of diabetes                            | 5301 (83.5)                            | 38 (82.6)*                             |
| Regular physical activity                      | 3598 (56.6)                            | 1 (7.7)*                               |
| Absence of social isolation                    | 4508 (71.0)                            | 79 (66.9)*                             |
| Healthy diet score                             | 749 (11.8)                             | 136 (17.2)*                            |

Abbreviations: N=number of people at risk, SD=standard deviation, IQR=interquartile range. Data are shown for non-imputed data. \* Percentages shown for available, non-missing data. Data presented as frequency (percent) for categorical values and mean  $\pm$  SD for continuous variables unless indicated otherwise.



## References

1. Kunkle, B.W., *et al.* Genetic meta-analysis of diagnosed Alzheimer's disease identifies new risk loci and implicates Abeta, tau, immunity and lipid processing. *Nat Genet* **51**, 414-430 (2019).
2. Sims, R., *et al.* Rare coding variants in PLCG2, ABI3, and TREM2 implicate microglial-mediated innate immunity in Alzheimer's disease. *Nat Genet* **49**, 1373-1384 (2017).
3. Harold, D., *et al.* Genome-wide association study identifies variants at CLU and PICALM associated with Alzheimer's disease. *Nat Genet* **41**, 1088-1093 (2009).
4. Seshadri, S., *et al.* Genome-wide analysis of genetic loci associated with Alzheimer disease. *JAMA* **303**, 1832-1840 (2010).
5. Hollingworth, P., *et al.* Common variants at ABCA7, MS4A6A/MS4A4E, EPHA1, CD33 and CD2AP are associated with Alzheimer's disease. *Nat Genet* **43**, 429-435 (2011).
6. Naj, A.C., *et al.* Common variants at MS4A4/MS4A6E, CD2AP, CD33 and EPHA1 are associated with late-onset Alzheimer's disease. *Nat Genet* **43**, 436-441 (2011).
7. Lambert, J.C., *et al.* Genome-wide association study identifies variants at CLU and CR1 associated with Alzheimer's disease. *Nat Genet* **41**, 1094-1099 (2009).
8. Lambert, J.C., *et al.* Meta-analysis of 74,046 individuals identifies 11 new susceptibility loci for Alzheimer's disease. *Nat Genet* **45**, 1452-1458 (2013).
9. Jonsson, T., *et al.* Variant of TREM2 associated with the risk of Alzheimer's disease. *N Engl J Med* **368**, 107-116 (2013).
10. Ruiz, A., *et al.* Assessing the role of the TREM2 p.R47H variant as a risk factor for Alzheimer's disease and frontotemporal dementia. *Neurobiol Aging* **35**, 444 e441-444 (2014).
